# Supplementary material for: Monkeys engage in visual simulation to solve complex problems
Source: PubMed Central journal article supplement — bioRxiv. 2024 Feb 26:2024.02.21.581495. Preprint. [Version 2] doi: 10.1101/2024.02.21.581495 (PMC10925096; doi:10.1101/2024.02.21.581495), 2024-02-26
Supplement: media-1.pdf [file media-1.pdf]

## Supplementary Table 1

**Table 4.1: Activation coordinates for the Motion > Flicker contrast from the motion localizer task**

| <i>CHARM Atlas Designation</i>       | <i>Peak x</i> | <i>Peak y</i> | <i>Peak z</i> | <i>Peak t-value</i> |
|--------------------------------------|---------------|---------------|---------------|---------------------|
| Visual area 2 (V2)                   | 23            | -6            | 13            | 6.04                |
| Dorsal visual area 3 (V3d)           | 18            | -8            | 20            | 6.22                |
| Dorsal visual area 4 (V4d)           | 21            | -7            | 21            | 8.43                |
| Middle temporal area (MT)            | 20            | -5            | 21            | 9.69                |
| Medial superior temporal area (MST)  | -18           | -1            | 20            | 5.62                |
| Medial intraparietal area (MIP)      | 3             | -6            | 24            | 4.48                |
| Caudal dorsal premotor cortex (PMdc) | 11            | 18            | 29            | 4.96                |
| Area 45b                             | 13            | 23            | 24            | 7.76                |
| Area TEO                             | -22           | 1             | 16            | 7.90                |

## Supplementary Table 2

**Activation coordinates for the Perception > Control contrast**

| <i>CHARM Atlas Designation</i>                  | <i>Peak x</i> | <i>Peak y</i> | <i>Peak z</i> | <i>Peak t-value</i> |
|-------------------------------------------------|---------------|---------------|---------------|---------------------|
| Primary visual area (V1)                        | -26           | -8            | 14            | 3.92                |
| Visual area 2 (V2)                              | -26           | -6            | 15            | 6.06                |
| Area IPa (IPa)                                  | -18           | 2             | 14            | 4.42                |
| Dorsal visual area 4 (V4d)                      | -23           | -2            | 21            | 2.77                |
| Middle temporal area (MT)                       | -16           | -6            | 22            | 4.77                |
| Medial superior temporal area (MST)             | 12            | -1            | 22            | 5.14                |
| Temporal parietooccipital associated area (TPO) | 19            | 5             | 14            | 4.62                |
| Area TEO (TEO)                                  | 28            | 1             | 15            | 5.47                |
| Area TEm (TEm)                                  | 23            | 6             | 10            | 4.18                |
| Floor of the superior temporal area (FST)       | 17            | 0             | 15            | 4.74                |
| Middle lateral belt region (ML)                 | -24           | 5             | 21            | 4.69                |
| Anterior lateral belt region (AL)               | -25           | 13            | 15            | 5.15                |

## Supplementary Table 3

**Activation coordinates for the Simulation > Control contrast**

| <i>CHARM Atlas Designation</i>                  | <i>Peak x</i> | <i>Peak y</i> | <i>Peak z</i> | <i>Peak t-value</i> |
|-------------------------------------------------|---------------|---------------|---------------|---------------------|
| Primary visual area (V1)                        | -19           | -1            | 21            | 5.20                |
| Visual area 2 (V2)                              | -26           | -6            | 15            | 4.12                |
| Visual area 3A (V3A)                            | 10            | -8            | 23            | 3.57                |
| Dorsal visual area 4 (V4d)                      | 27            | -2            | 17            | 4.37                |
| Middle temporal area (MT)                       | -18           | -6            | 22            | 4.96                |
| Medial superior temporal area (MST)             | -19           | -1            | 21            | 5.20                |
| Temporal parietooccipital associated area (TPO) | -20           | -2            | 21            | 5.18                |
| Area V23                                        | 1             | -5            | 20            | 5.58                |
